# Supplementary material
Source: PubMed Central journal article supplement (PMC3983163)
Supplement: cg401777x_si_001.pdf [file cg401777x_si_001.pdf]

## Supplementary Information:

# Tracking amorphous precursor formation and transformation during induction stages of nucleation

Baoquan Xie, Ballav M. Borah, Timothy J. Halter, and George H. Nancollas\*

Department of Chemistry, University at Buffalo, The State University of New York, Buffalo, NY 14260, USA

E-mail: [xiebaoquan@gmail.com](mailto:xiebaoquan@gmail.com); [ghn@buffalo.edu](mailto:ghn@buffalo.edu)

---

\*To whom correspondence should be addressed

## Information available in this document:

1. Typical pH change curve for HAP nucleation experiment with  $\sigma_{\text{HAP}} = 21.06$ ;
2. Morphology evolution and phase transformation of ACP phase under TEM electron beam hitting for a same sample;
3. Ca/P ratio of precipitates obtained by EDX and XPS at different stages.

### Supplementary information 1

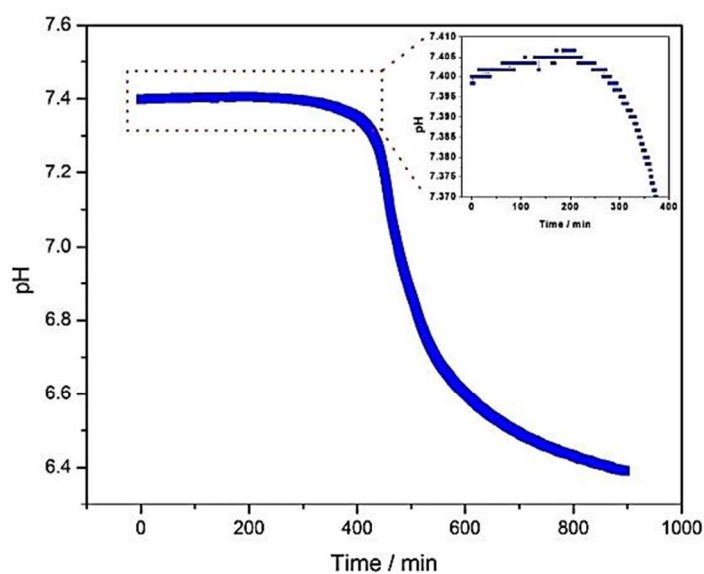

**Figure S1** Typical pH change curve for HAP nucleation experiment with  $\sigma_{\text{HAP}} = 21.06$ ,  $[\text{Ca}] = 1.3 \text{ mM}$ ,  $[\text{P}] = 0.78 \text{ mM}$ , I.S. =  $0.006 \text{ M}$  and starting pH = 7.400 at 310.15 K (free drift experiments, no titrant addition). A slow pH increase at early induction time was detected.

## Supplementary information 2

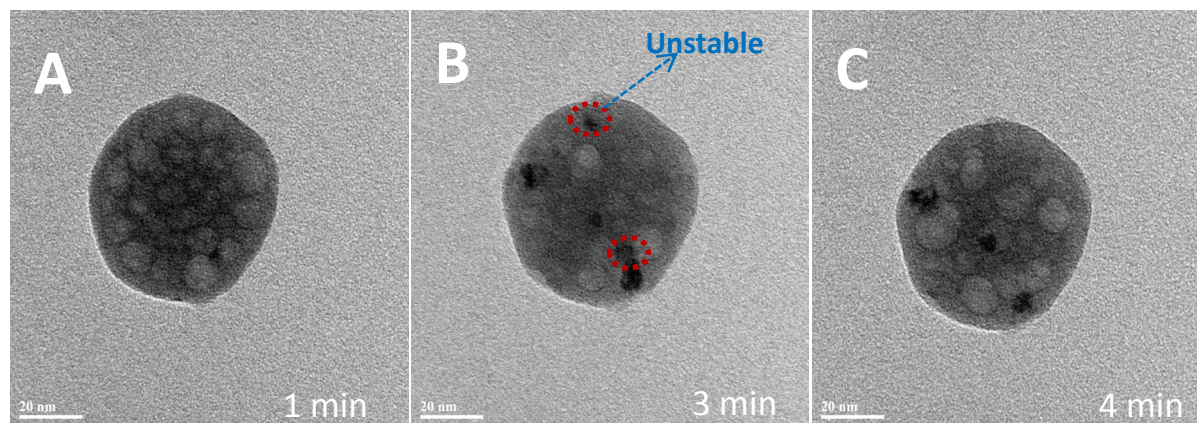

**Figure S2** Morphology evolution and phase transformation of ACP phase under *in-situ* TEM electron beam hitting for a same sample. (A) Typical porous loose morphology of ACP-I phase formed after solution mixing. (B) After 3 min, the tiny pre-critical nuclei formed with the ACP phase. (B) Some of unstable pre-critical nuclei disappeared at 4 min because of the small size. Scale bar: (A-C) 20 nm.

### Supplementary information 3

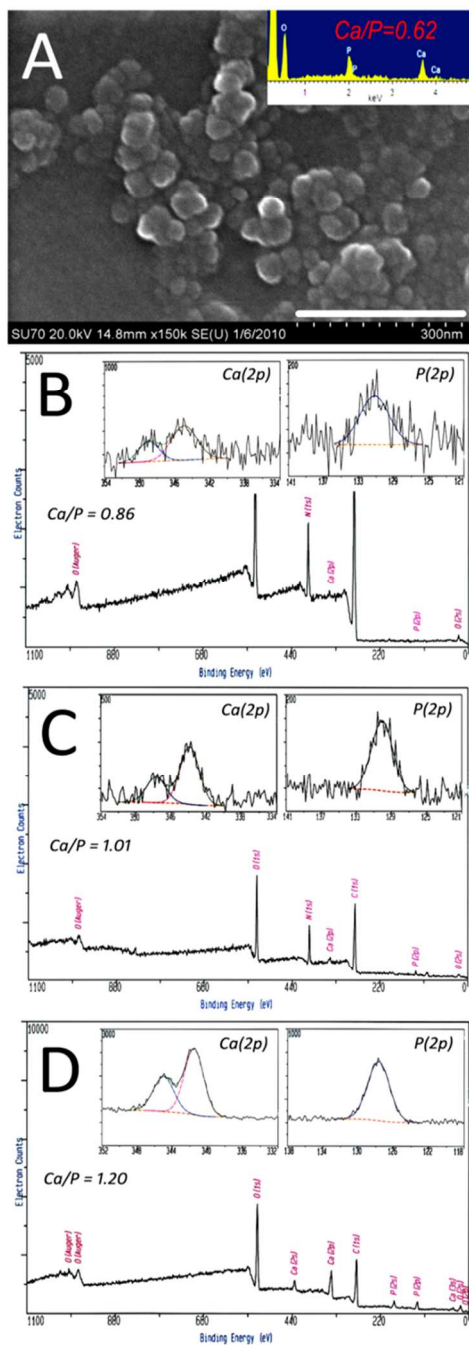

**Figure S3.** Ca/P ratio of precipitates at different stages. **(A)** SEM micrograph and EDX for ACP at 90 min. **(B-D)** XPS profile for the sample taken at 180 min, 400 min and 600 min, respectively.

**Table S1.** The estimated particle size from TEM micrographs (90 min from SEM micrograph).

| <b>Time</b> | <b>Particle Size (nm)</b> |
|-------------|---------------------------|
| 20          | 30                        |
| 90          | 60                        |
| 120         | 100                       |
| 240         | 200                       |
| 400         | 300                       |
| 600         | 50                        |

**Table S2.** pH, conductivity, and Ca ion activity changes during HAP nucleation experiments with  $\sigma_{\text{HAP}} = 20.0$ , addition rate of calcium solution was 200  $\mu\text{L}/\text{min}$ . , I.S. = 0.006 M, starting pH = 7.40, at 37.0 °C. Time corresponds to Fig. 1a (manuscript).

| Stage            | Initial Phase | Final Phase | Change in pH ( $\Delta\text{pH}$ ) | Change in Ca ion activity | Change in Conductivity | Time (min) |
|------------------|---------------|-------------|------------------------------------|---------------------------|------------------------|------------|
| Calcium Addition | -             | ACP-1       | decrease (-0.04)                   | increase                  | increase               | 1270-1290  |
| Stage-1          | ACP-1         | ACP-2       | increase (+0.01)                   | none                      | increase               | 1290-1480  |
| Stage-2          | ACP-2         | HAP         | decrease(-0.02)                    | none                      | decrease               | 1480-1700  |
| Mineralization   | HAP           | HAP         | large decrease (-1.00)             | decrease                  | decrease               | >1700      |
